# Supplementary material for: Human Neonatal MR1T Cells Have Diverse TCR Usage, are Less Cytotoxic and are Unable to Respond to Many Common Childhood Pathogens
Source: bioRxiv preprint, doi:10.1101/2025.03.17.643805, version 1 (2025-03-18)
Supplement: Supplemental Table 6 and 7 [file 643805_file09.docx]

**Supplemental Table 6. Diffraction data collection and refinement statistics**

|  | Cord A2 TCR-MR1-5-OP-RU |
| --- | --- |
| Wavelength (Å) | 0.9537 |
| Resolution range (Å) | 46.84 - 2.52 (2.59 - 2.52) |
| Space group | P 21 21 21 |
| Unit cella, b, c (Å)α, β, γ (°) | 62.526 114.533 141.3  90 90 90 |
| Total reflections | 69666 (5720) |
| Unique reflections | 34953 (2871) |
| Multiplicity | 2.0 (2.0) |
| Completeness (%) | 99.57 (99.65) |
| Mean I/sigma(I) | 10.20 (2.04) |
| Wilson B-factor | 41.61 |
| R-merge | 0.0467 (0.359) |
| R-meas | 0.06605 (0.5077) |
| R-pim | 0.0467 (0.359) |
| CC1/2 | 0.997 (0.768) |
| CC* | 0.999 (0.932) |
| R-work | 0.1827 (0.2765) |
| R-free | 0.2087 (0.3104) |
| Number of non-hydrogen atoms | 6708 |
| macromolecules | 6314 |
| ligands | 22 |
| solvent | 372 |
| Protein residues | 791 |
| RMSD (bonds) (Å) | 0.116 |
| RMSD (angles) (°) | 2.37 |
| Ramachandran favored (%) | 97.29 |
| Ramachandran allowed (%) | 2.58 |
| Ramachandran outliers (%) | 0.13 |
| Rotamer outliers (%) | 4.33 |
| Average B-factor | 47.41 |
| macromolecules | 47.46 |
| ligands | 28.16 |
| solvent | 47.65 |

Statistics for the highest-resolution shell are shown in parentheses.

**Supplemental Table 7. Contacts of A2 TCR with MR1-5-OP-RU**

| **TCR gene** | **TCR residues** | **MR1 residues** | **Bond type** |
| --- | --- | --- | --- |
| **CDR1⍺** | Gly28 | Glu160 | VDW |
|  | Phe29 | Glu160 | VDW |
|  | Phe29-N | Glu160-Oε2 | H-bond |
|  | Phe29-O | Asn155-Nδ2, Glu160-Oε2 | H-bond |
|  | Asn30 | Tyr152, Trp156, Glu160 | VDW |
| **CDR2⍺** | Tyr48 | His148, Tyr152 | VDW |
|  | Val50 | Leu151, Tyr152, Asn155 | VDW |
|  | Leu51 | Leu151, Lys154 | VDW |
|  | Glu55 | His148 | VDW |
| **FW⍺** | Arg66 | Asn155, Glu159 | VDW |
|  | Arg66-Nη1 | Asn155-Oδ1 | H-bond |
| **CDR3⍺** | Ser93 | Tyr62, Glu160, Trp164 | VDW |
|  | Ser93-O | Tyr62-OH | H-bond |
|  | Ser94-O | Arg61-Nε, Arg61-Nη2 | H-bond |
|  | Ser94 | Arg61, Leu65 | VDW |
|  | Tyr95 | Arg61, Tyr62, Leu65, Tyr152, Trp156 | VDW |
|  | Tyr95-O | Arg61-Nη2 | H-bond |
|  | Tyr95-OH | Tyr152-OH, Trp156-Nε1 | H-bond |
| **CDR1β** | Tyr31 | Gly68 | VDW |
| **CDR2β** | Tyr48-OH | Arg61-Nη1 | H-bond |
|  | Tyr48 | Arg61, Gln64 | VDW |
|  | Val50 | Gln64 | VDW |
| **FWβ** | Ala56 | Gln64 | VDW |
| **CDR3β** | Thr97-Oɣ1 | Trp69-Nε1 | H-bond |
|  | Thr97 | Leu65 | VDW |
|  | Asn98-Oδ1 | Glu149-Oε2 | H-bond |
|  | Asn98-Nδ2 | Glu149-Oε2 | H-bond |
|  | Asn98 | Glu149, Tyr152 | VDW |
|  | Tyr99-OH | His148-Nδ1 | H-bond |
|  | Tyr99 | His148 | VDW |

- Atomic contacts determined using the *CONTACT* program of the CCP4i package with cutoff of 4 Å.
- Hydrogen bond interactions are defined as contact distances of 3.5 Å or less.
- Van der Waals (VDW) interactions are defined as non-hydrogen bond contact distances of less than 4 Å.
- R: 5-OP-RU
